# Supplementary material
Source: Springer Nature journal article supplement (https://www.springermedizin.de/resource/supplementary/12913_2011_1919_MOESM1_ESM.pdf/9529580)
Supplement: MOESM1 [file 9529580]

| Mnemonic | Element                 | Definition                                                                                                                                |
|----------|-------------------------|-------------------------------------------------------------------------------------------------------------------------------------------|
| SBAR     | <u>S</u> ituation       | The clinical state of patient at time of handover                                                                                         |
|          | <u>B</u> ackground      | Patient's identification, demographics, medical and social history, medications (including those given in ICU), interventions in hospital |
|          | <u>A</u> ssessment      | Evaluation of patient's condition, medical problems, needs and prognosis;<br>Current management plan                                      |
|          | <u>R</u> ecommendations | Advice given or discussion about future plans                                                                                             |
| SOAP     | <u>S</u> ubjective      | Patient complaints, symptoms and other data compiled from the history                                                                     |
|          | <u>O</u> bjective       | Data from physical examination, monitoring and any investigation                                                                          |
|          | <u>A</u> ssessment      | Evaluation of patient's condition, medical problems, needs and prognosis                                                                  |
|          | <u>P</u> lan            | Current and future plans for investigations, treatment, education or any future actions                                                   |
